# Supplementary material for: Dysregulated meta-organismal metabolism of aromatic amino acids in alcohol-associated liver disease
Source: PubMed Central journal article supplement (PMC10578770; doi:10.1097/hc9.0000000000000284), 2023-10-12

# Supplementary Figures:

## Dysregulated Meta-Organismal Metabolism of Aromatic Amino Acids in Alcohol-Associated Liver Disease

Marko Mrdjen<sup>1,2,3</sup>, Emily Huang<sup>1</sup>, Annette Bellar<sup>1</sup>, Nicole Welch<sup>1,4</sup>, Jaividhya Dasarathy<sup>5</sup>, David Streem<sup>6</sup>, Craig J McClain<sup>7</sup>, Mack Mitchell<sup>8</sup>, Svetlana Radaeva<sup>9</sup>, Bruce Barton<sup>10</sup>, Gyongyi Szabo<sup>11</sup>, Srinivasan Dasarathy<sup>1,4,12,13</sup>, Zeneng Weng<sup>2,12,13</sup>, Stanley L Hazen<sup>2,12,13</sup>, J. Mark Brown<sup>2,3,12,13</sup>, Laura E Nagy<sup>1,12,13</sup>

Supplemental Figure 1 – Concentrations of microbe-derived metabolites

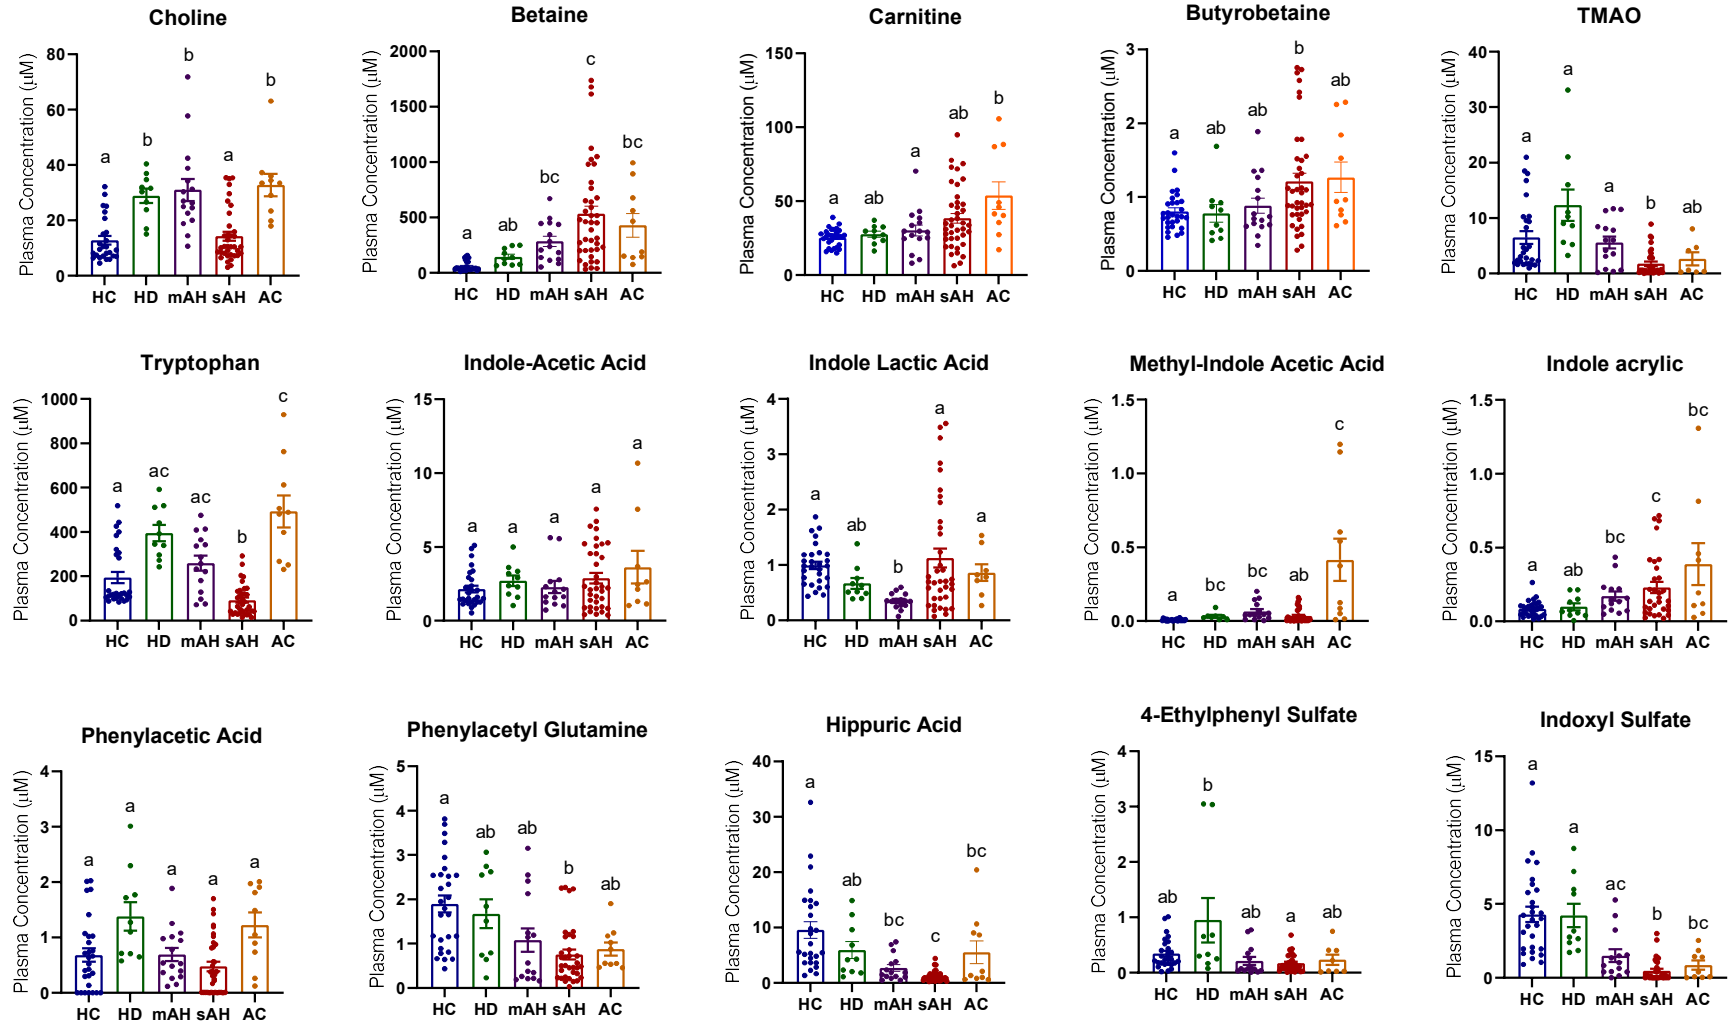



Supplementary Figure 3 – Correlations between metabolites and glomerular filtration rate in patients with sAH

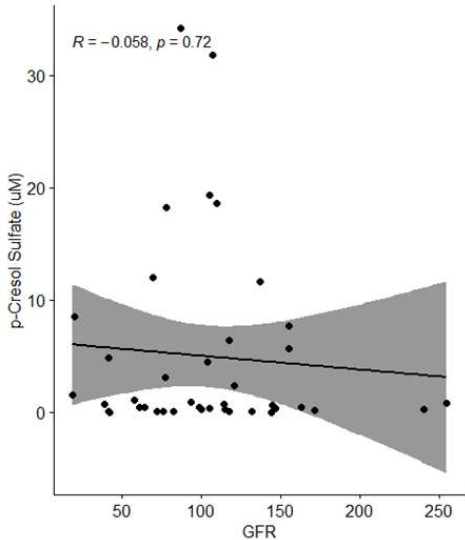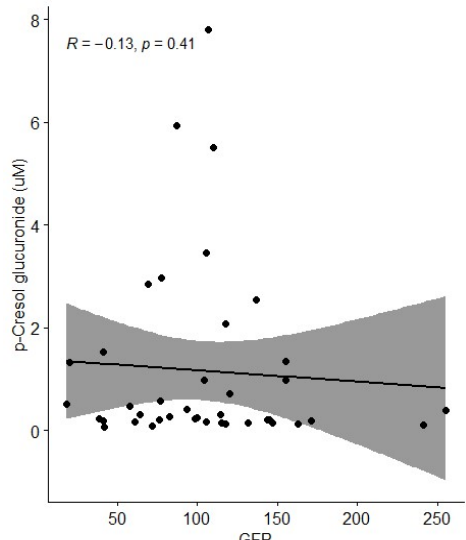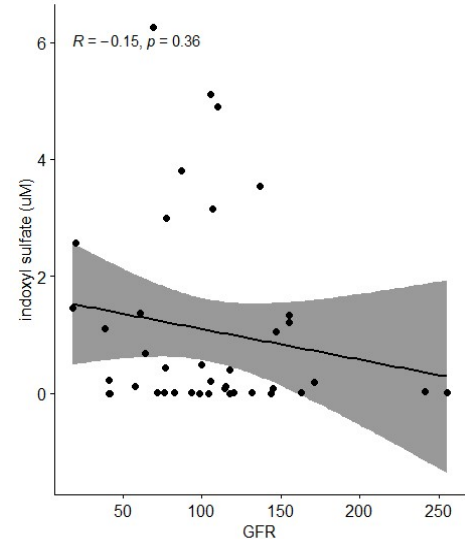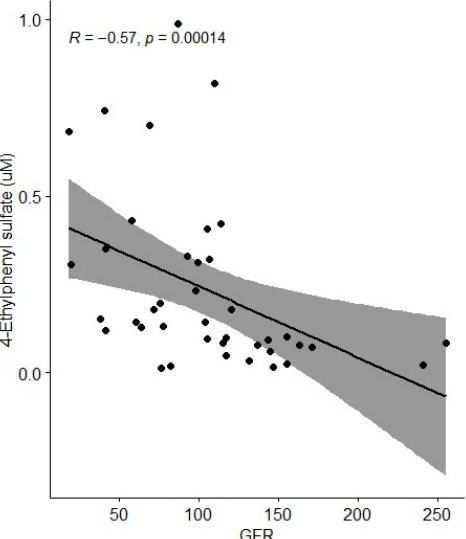

Supplement: hc9-7-e0284-s001.pdf [file hc9-7-e0284-s001.pdf]
